# Supplementary material for: Coke-resistant Ni-based bimetallic catalysts for the dry reforming of methane: effects of indium on the Ni/Al2O3catalyst
Source: Royal Society of Chemistry journal article supplement (doi:10.1039/d2cy00582d), 2022-01-01
Supplement: d2cy00582d1.pdf [file d2cy00582d1.pdf]

## Supporting Information

### **Coke-resistant Ni-based bimetallic catalysts for dry reforming methane: effects of indium on the Ni/Al<sub>2</sub>O<sub>3</sub> catalyst**

Chuanshen Wang, Tongming Su, Zuzeng Qin\*, and Hongbing Ji\*

School of Chemistry and Chemical Engineering, Guangxi Key Laboratory of Petrochemical Resource  
Processing and Process Intensification Technology, Guangxi University, Nanning, 530004, China

---

\* Corresponding author. E-mail: qinzuzeng@gxu.edu.cn (Z. Q.); jihb@mail.sysu.edu.cn (H. J.)

## Experimental

### Catalysts characterization

H<sub>2</sub> temperature-programmed reduction (H<sub>2</sub>-TPR) were performed on an AMI-300 catalyst characterization system equipped with the TCD detector was set to 100 °C and the bridge current was set to 75 mA. 50 mg samples were pre-treated in an Ar flow (30 ml min<sup>-1</sup>) for 1 h at 300 °C to remove water and impurities in the catalyst, then switch to 10 vol% H<sub>2</sub>/Ar (30 ml min<sup>-1</sup>) by valve actuation and wait for the baseline to stabilize. The temperature is increased from 50 °C to 1000 °C with a temperature ramping rate of 10 °C min<sup>-1</sup>, the tail gas is fed into the TCD detector to record the data.

CO<sub>2</sub> temperature programmed desorption (CO<sub>2</sub>-TPD) conducted using AMI-300 catalyst characterization system equipped with the TCD detector was set to 100 °C and the bridge current was set to 135 mA. 100 mg sample were pre-treated in an Ar flow (30 ml min<sup>-1</sup>) at 300 °C for 1 h, then warmed to 800 °C for reduction for 1 h. After the reduction, the system was cooled to 50 °C and switched to CO<sub>2</sub> (30 ml min<sup>-1</sup>) for static adsorption for 1 hour until saturation. Afterwards, the sample was purged with He (30 ml min<sup>-1</sup>) until baseline stable, later the temperature was risen from 50 °C to 800 °C with a temperature ramping rate of 10 °C min<sup>-1</sup>, the tail gas is fed into the TCD detector to record the data.

NH<sub>3</sub> temperature programmed desorption (NH<sub>3</sub>-TPD) also conducted using AMI-300 catalyst characterization system equipped with the TCD detector was set to 100 °C and the bridge current was set to 135 mA. Samples (100 mg) were pre-treated were pre-treated in an Ar flow (30 ml min<sup>-1</sup>) at 300 °C for 1 h, then warmed to 800 °C for reduction for 1 h. After the reduction, the system was cooled to 100 °C and switched to NH<sub>3</sub> (30 ml min<sup>-1</sup>) for static

adsorption for 1 hour until saturation. Afterwards, the sample was purged with He ( $30 \text{ ml min}^{-1}$ ) until baseline stable, later the temperature was risen from  $100 \text{ }^\circ\text{C}$  to  $800 \text{ }^\circ\text{C}$  with a temperature ramping rate of  $10 \text{ }^\circ\text{C min}^{-1}$ , the tail gas is fed into the TCD detector to record the data.

$\text{H}_2$  chemisorption were performed on an AMI-300 catalyst characterization system equipped with the TCD detector was set to  $100 \text{ }^\circ\text{C}$  and the bridge current was set to  $75 \text{ mA}$ .  $200 \text{ mg}$  sample were pre-treated in an Ar flow ( $30 \text{ ml min}^{-1}$ ) at  $300 \text{ }^\circ\text{C}$  for 1 h, then warmed to  $800 \text{ }^\circ\text{C}$  for reduction for 1 h. After the reduction, the system was cooled to  $50 \text{ }^\circ\text{C}$  and was purged with Ar ( $30 \text{ ml min}^{-1}$ ) until baseline stable. Afterwards, switched to  $10 \text{ } \%$   $\text{H}_2/\text{Ar}$  is pulsed in 20 times and the tail gas enters the TCD detector to collect data. The difference between the measured stable  $\text{H}_2$  absorption peak area and the absorption peak area of each pulse is the total amount of  $\text{H}_2$  chemisorbed and the degree of dispersion of the active metal on the catalyst surface can be obtained by calculation. The calculation formula is shown in Eq (4).

Table S1 The fitting results of surface oxygen species on the basis of O 1s spectra over the reduced catalysts.

| Sample                                 | $O_{\alpha}$ |          | $O_{\beta}$ |          | $O_{\gamma}$ |          |
|----------------------------------------|--------------|----------|-------------|----------|--------------|----------|
|                                        | BE (eV)      | Area (%) | BE (eV)     | Area (%) | BE (eV)      | Area (%) |
| Ni/Al <sub>2</sub> O <sub>3</sub>      | 531.78       | 73.5     | 533.24      | 19.9     | 534.27       | 6.60     |
| In/Al <sub>2</sub> O <sub>3</sub>      | 531.15       | 55.6     | 532.17      | 34.4     | 533.38       | 10.0     |
| 3Ni-2In/Al <sub>2</sub> O <sub>3</sub> | 530.73       | 64.9     | 531.92      | 29.9     | 533.25       | 5.20     |

Table S2 NH<sub>3</sub> desorption amount of the support and catalysts

| Sample                                 | NH <sub>3</sub> desorption (μmol/g <sub>cat</sub> ) |
|----------------------------------------|-----------------------------------------------------|
| Al <sub>2</sub> O <sub>3</sub>         | 315                                                 |
| Ni/Al <sub>2</sub> O <sub>3</sub>      | 468                                                 |
| In/Al <sub>2</sub> O <sub>3</sub>      | 302                                                 |
| 4Ni-1In/Al <sub>2</sub> O <sub>3</sub> | 437                                                 |
| 3Ni-2In/Al <sub>2</sub> O <sub>3</sub> | 407                                                 |
| 2Ni-3In/Al <sub>2</sub> O <sub>3</sub> | 406                                                 |
| 1Ni-4In/Al <sub>2</sub> O <sub>3</sub> | 390                                                 |

Table S3 Activity comparison of the Ni-based catalysts for DRM.

| Catalyst                                               | WHSV<br>(mL h <sup>-1</sup> g <sub>cat</sub> <sup>-1</sup> ) | CH <sub>4</sub> /CO <sub>2</sub> /inert gas           | CH <sub>4</sub> conversion<br>(%) | Temperature<br>(°C) | Reference |
|--------------------------------------------------------|--------------------------------------------------------------|-------------------------------------------------------|-----------------------------------|---------------------|-----------|
| Ni/Al <sub>2</sub> O <sub>3</sub>                      | 18000                                                        | 1CH <sub>4</sub> /1CO <sub>2</sub> /1N <sub>2</sub>   | 78.8                              | 700                 | This work |
| In/Al <sub>2</sub> O <sub>3</sub>                      | 18000                                                        | 1CH <sub>4</sub> /1CO <sub>2</sub> /1N <sub>2</sub>   | 9.1                               | 700                 |           |
| 1Ni-4In/Al <sub>2</sub> O <sub>3</sub>                 | 18000                                                        | 1CH <sub>4</sub> /1CO <sub>2</sub> /1N <sub>2</sub>   | 6.5                               | 700                 |           |
| 2Ni-3In/Al <sub>2</sub> O <sub>3</sub>                 | 18000                                                        | 1CH <sub>4</sub> /1CO <sub>2</sub> /1N <sub>2</sub>   | 21.6                              | 700                 |           |
| 3Ni-2In/Al <sub>2</sub> O <sub>3</sub>                 | 18000                                                        | 1CH <sub>4</sub> /1CO <sub>2</sub> /1N <sub>2</sub>   | 91.1                              | 700                 |           |
| 4Ni-1In/Al <sub>2</sub> O <sub>3</sub>                 | 18000                                                        | 1CH <sub>4</sub> /1CO <sub>2</sub> /1N <sub>2</sub>   | 66.8                              | 700                 |           |
| In <sub>0.5</sub> Ni@SiO <sub>2</sub>                  | 18000                                                        | 1CH <sub>4</sub> /1CO <sub>2</sub>                    | 92                                | 800                 | 1         |
| Ni-In/Al <sub>2</sub> O <sub>3</sub>                   | 21000                                                        | 49.5CH <sub>4</sub> /49.5CO <sub>2</sub> /1Ar         | 28                                | 650                 | 2         |
| Ni-In/Ce-Al <sub>2</sub> O <sub>3</sub>                | 21000                                                        | 49.5CH <sub>4</sub> /49.5CO <sub>2</sub> /1Ar         | 25                                | 650                 |           |
| Ni-In/SiO <sub>2</sub>                                 | 40000                                                        | 69CH <sub>4</sub> /30CO <sub>2</sub> /1Ar             | 19.5                              | 600                 | 3         |
| 2.5Co-2.5Ni@SGA                                        | 36000                                                        | 1CH <sub>4</sub> /1CO <sub>2</sub> /1Ar               | 30                                | 600                 | 4         |
| (NiMg) <sub>4</sub> Al                                 | 3840000                                                      | 1CH <sub>4</sub> /1CO <sub>2</sub> /2N <sub>2</sub>   | 69.8                              | 900                 | 5         |
| Ni <sub>5</sub> /MgAl <sub>2</sub> O <sub>4</sub> (SA) | 60000                                                        | 1CH <sub>4</sub> /1CO <sub>2</sub> /3N <sub>2</sub>   | 93.0                              | 750                 | 6         |
|                                                        | 60000                                                        | 1CH <sub>4</sub> /1CO <sub>2</sub> /3N <sub>2</sub>   | 74.2                              | 650                 |           |
| 12%Ni/Mg <sub>3</sub> Al                               | 60000                                                        | 1CH <sub>4</sub> /1CO <sub>2</sub> /2N <sub>2</sub>   | 88                                | 750                 | 7         |
| Ni-Ce/ZrO <sub>2</sub>                                 | 24000                                                        | 1CH <sub>4</sub> /1CO <sub>2</sub>                    | 55                                | 700                 | 8         |
| Ni-Y/ZrO <sub>2</sub>                                  | 24000                                                        | 1CH <sub>4</sub> /1CO <sub>2</sub>                    | 70                                | 700                 |           |
| Ni-P/Al <sub>2</sub> O <sub>3</sub>                    | 18000                                                        | 1CH <sub>4</sub> /1CO <sub>2</sub> /1Ar               | 84                                | 750                 | 9         |
| Ni-2P/Al <sub>2</sub> O <sub>3</sub>                   | 18000                                                        | 1CH <sub>4</sub> /1CO <sub>2</sub> /1Ar               | 65                                | 750                 |           |
| Hollow-NiPt/SiO <sub>2</sub>                           | 60000                                                        | 1CH <sub>4</sub> /1CO <sub>2</sub> /1N <sub>2</sub>   | 94.9                              | 800                 | 10        |
| Mo/Ni/Al <sub>2</sub> O <sub>3</sub> -CeO <sub>2</sub> | 12000                                                        | 1CH <sub>4</sub> /1CO <sub>2</sub>                    | 72                                | 700                 | 11        |
| 0.01 %Rh/Al <sub>2</sub> O <sub>3</sub>                | 12000                                                        | 47CH <sub>4</sub> /47CO <sub>2</sub> /6N <sub>2</sub> | 83                                | 750                 | 12        |
| Ni/ZrO <sub>2</sub> -Al <sub>2</sub> O <sub>3</sub>    | 25000                                                        | 1CH <sub>4</sub> /1CO <sub>2</sub>                    | 58                                | 700                 | 13        |
| Co-Al/ZrO <sub>2</sub>                                 | 60000                                                        | 2CH <sub>4</sub> /2CO <sub>2</sub> /1N <sub>2</sub>   | 67.6                              | 850                 | 14        |
| Ni-Co/SiO <sub>2</sub>                                 | 50000                                                        | 1CH <sub>4</sub> /1CO <sub>2</sub> /8He               | 80                                | 700                 | 15        |
| Ga/MCM-41                                              | 39000                                                        | 30CH <sub>4</sub> /30CO <sub>2</sub> /5N <sub>2</sub> | 85                                | 800                 | 16        |
| NiMg <sub>1</sub> Al <sub>1</sub>                      | 80000                                                        | 1CH <sub>4</sub> /1CO <sub>2</sub>                    | 83                                | 800                 | 17        |
| NaOH Ni/MgO-Al <sub>2</sub> O <sub>3</sub>             | 48000                                                        | 1CH <sub>4</sub> /1CO <sub>2</sub> /2N <sub>2</sub>   | 91                                | 800                 | 18        |

Table S4  $I_D/I_G$  ratios obtained from carbon-related peaks for each of the samples subjected to DRM reaction.

| Sample                                 | $I_D/I_G$ |
|----------------------------------------|-----------|
| Ni/Al <sub>2</sub> O <sub>3</sub>      | 1.19      |
| In/Al <sub>2</sub> O <sub>3</sub>      | 1.35      |
| 3Ni-2In/Al <sub>2</sub> O <sub>3</sub> | 0.44      |

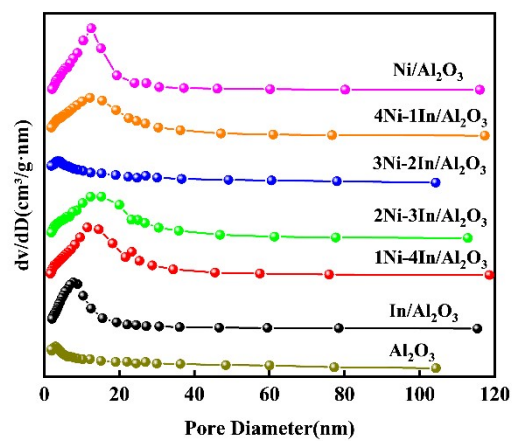

Fig. S1 The pore size distribution curves of the support and catalysts.



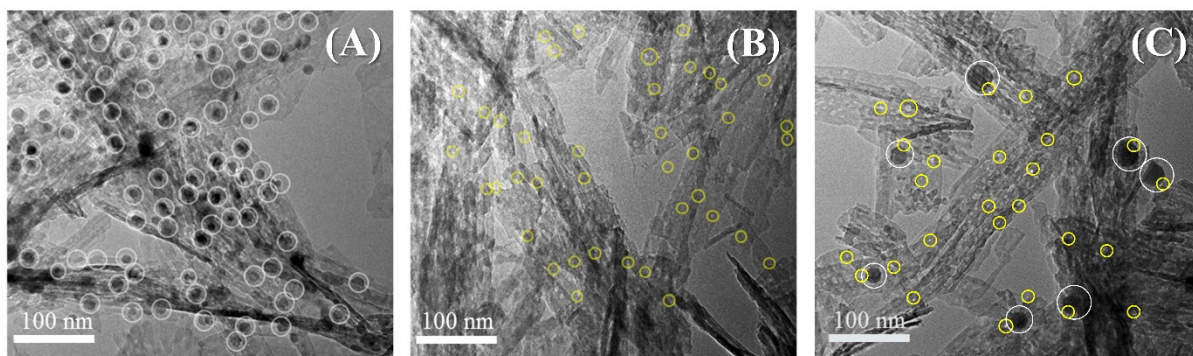

Fig. S2 TEM images of reduced Ni/Al<sub>2</sub>O<sub>3</sub> (A), In/Al<sub>2</sub>O<sub>3</sub> (B), and 3Ni-2In/Al<sub>2</sub>O<sub>3</sub> (C) (Ni and In particles are marked with white and yellow lines, respectively).

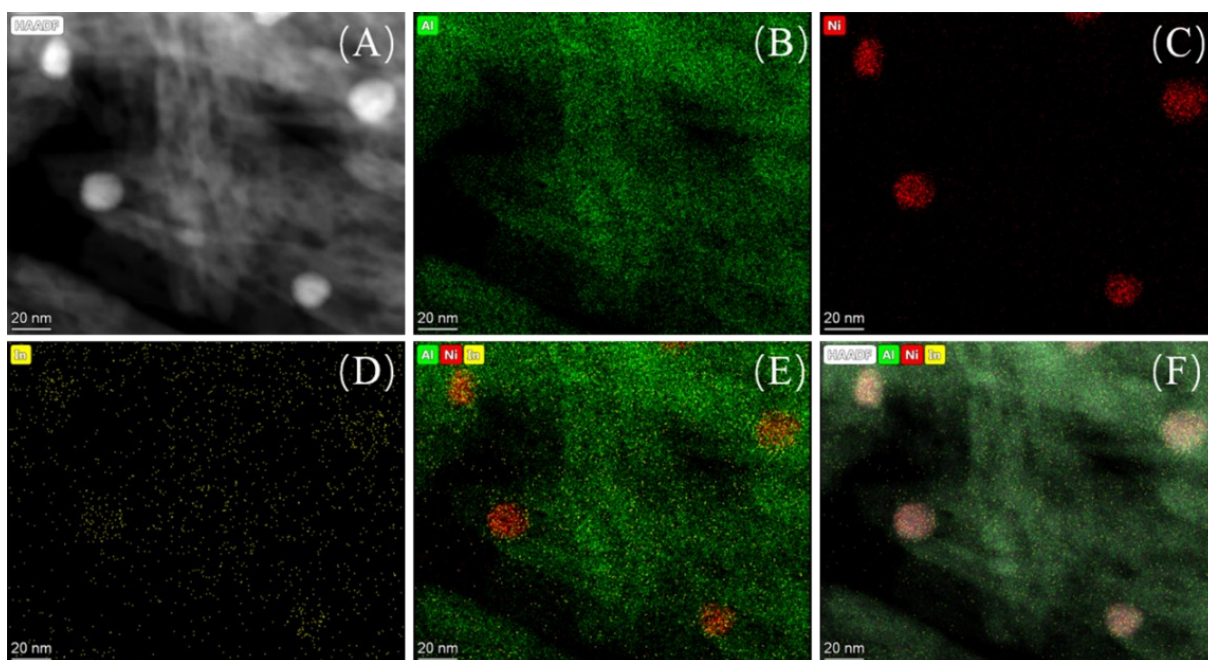

Fig. S3 HAADF-STEM image (A) and EDS profile of Al (B), Ni (C), In (D), and merged images (E) and (F) in reduced Ni-In/ $\text{Al}_2\text{O}_3$  catalyst.

The composition of the reduced bimetallic particles in the catalyst was determined using scanning TEM (STEM) coupled with energy-dispersive X-ray spectroscopy (EDS), as shown in Fig. S3. The high-angle annular dark-field (HAADF) STEM image in Fig. S3A and EDS elemental mappings of Ni in Fig. S3C shows a clear agglomeration of Ni nanoparticles on the support surface due to the high temperature reduction process. According to EDS elemental mappings in Fig. S3B, the spatial distribution of Al is uniform. The agglomeration of Ni also affects the distribution of In particles, In particles also display a trend of partial concentration of distribution due to the interaction between Ni and In (Fig. S3D), and the merged image (Fig. S3E) further confirms the distribution of In was influenced by Ni.

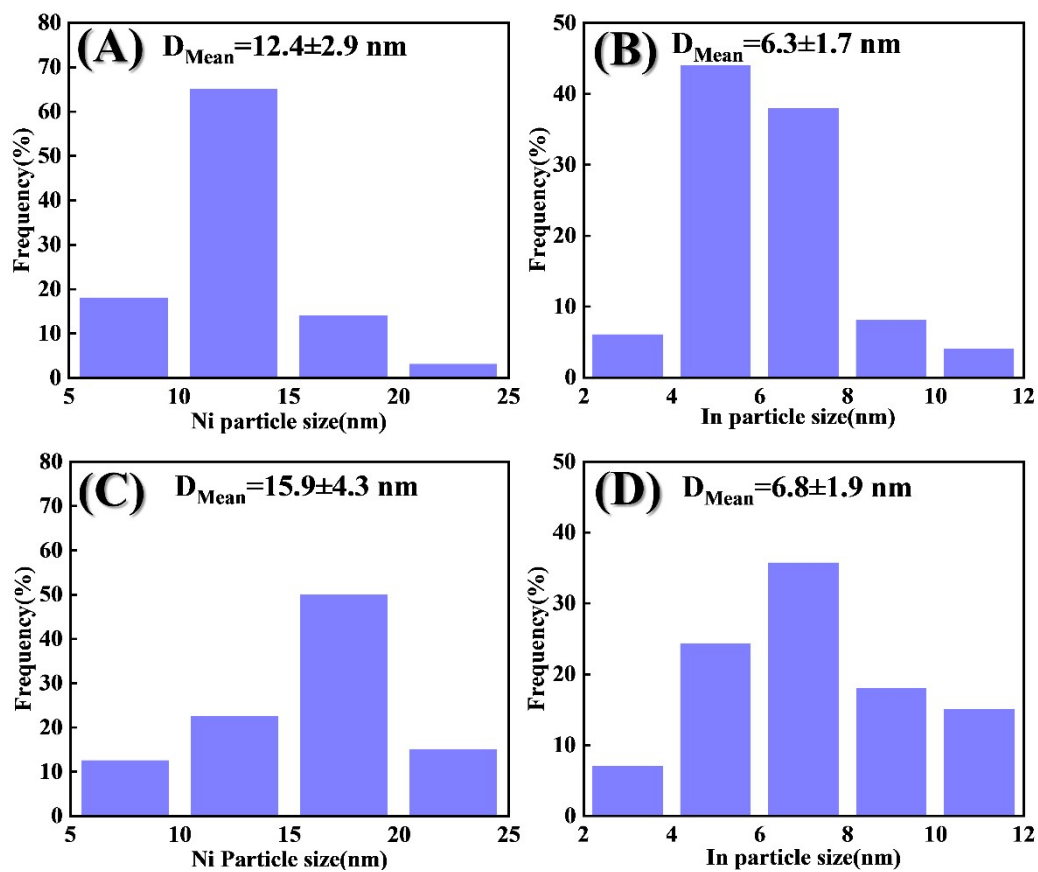

Fig. S4 Particle size distributions of Ni and In in the (A) Ni/Al<sub>2</sub>O<sub>3</sub>, (B) In/Al<sub>2</sub>O<sub>3</sub>, (C) and (D) 3Ni-2In/Al<sub>2</sub>O<sub>3</sub> catalyst.

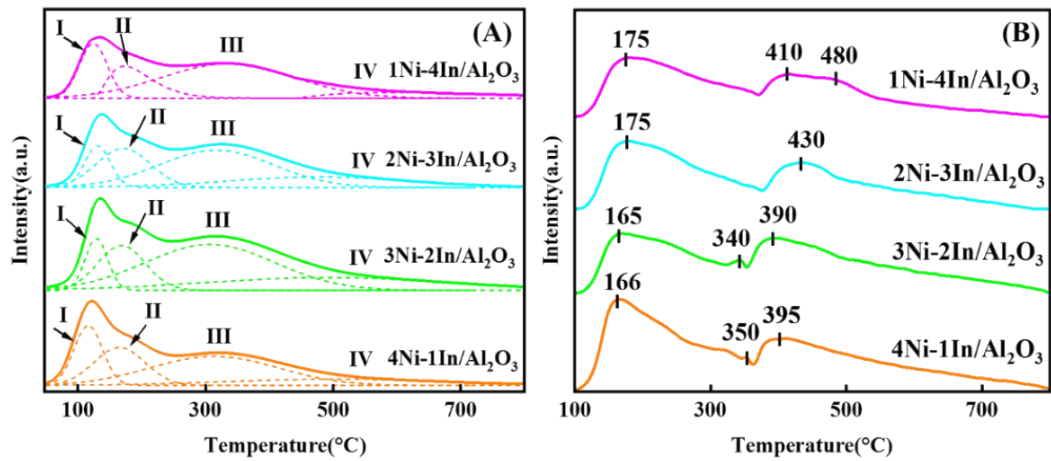

Fig. S5 (A) CO<sub>2</sub>-TPD and (B) NH<sub>3</sub>-TPD curves of fresh calcined catalysts with different Ni-In ratios.

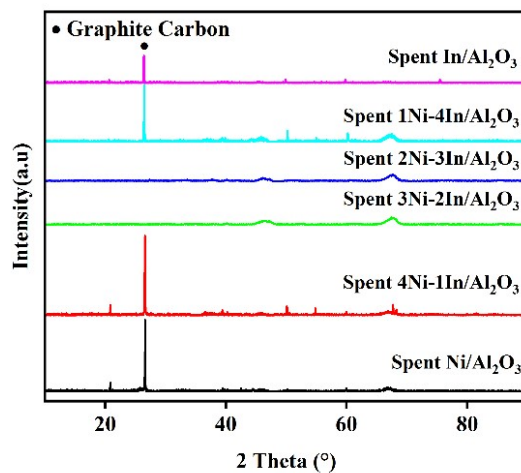

Fig. S6 XRD patterns of the spent catalysts.

The XRD patterns of the spent catalysts are shown in Fig. S6, and compared with the fresh catalysts, it is clearly observed that a strong carbon species peak at  $26.6^\circ$  (JCPDS no. 89-8487) of the Ni/Al<sub>2</sub>O<sub>3</sub>, In/Al<sub>2</sub>O<sub>3</sub>, 4Ni-1In/Al<sub>2</sub>O<sub>3</sub>, and 1Ni-4In/Al<sub>2</sub>O<sub>3</sub>, indicating a large amount of carbon generated during the reaction. However, there is no obvious carbon peak for the 2Ni-3In/Al<sub>2</sub>O<sub>3</sub> catalysts and 3Ni-2In/Al<sub>2</sub>O<sub>3</sub> catalysts, indicating little or no carbon deposition in these two catalysts during the reaction.

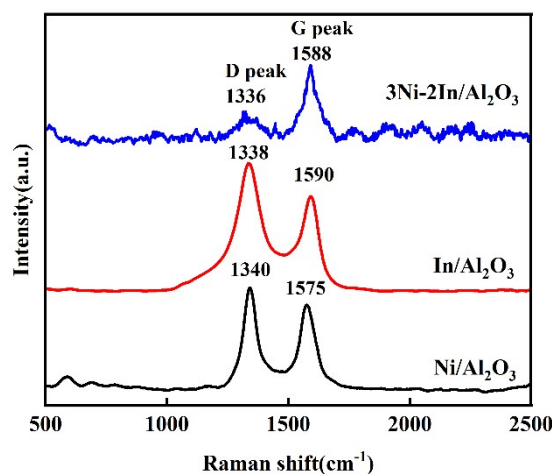

Fig. S7 Raman spectra of the spent catalysts.

In the spectrum, two prominent peaks appear in the wavenumber ranges of 1336-1340 cm<sup>-1</sup> (D band) and 1575-1590 cm<sup>-1</sup> (G band). The D band is attributed to structural defects of carbon, representing amorphous carbon or whisker carbon with flaws, while the G-band is attributed to the stretching vibration of the sp<sup>2</sup> bond in ordered graphitic carbon<sup>19</sup>. The intensity of the D-band peaks of the 3Ni-2In/Al<sub>2</sub>O<sub>3</sub> catalysts was significantly lower, indicating that the amount of amorphous or whisker carbon produced on the spent 3Ni-2In/Al<sub>2</sub>O<sub>3</sub> catalysts was less compared to the other two catalysts. The relative intensity between the D and G bands ( $I_D/I_G$ ) reflects the degree of crystallinity of the carbon deposition. The change in the  $I_D/I_G$  ratio of different catalysts is illustrated in Table S4, In/Al<sub>2</sub>O<sub>3</sub> catalysts (1.35) > Ni/Al<sub>2</sub>O<sub>3</sub> catalysts (1.19) > 3Ni-2In/Al<sub>2</sub>O<sub>3</sub> catalyst (0.44). The  $I_D/I_G$  ratio for the spent Ni/Al<sub>2</sub>O<sub>3</sub> and In/Al<sub>2</sub>O<sub>3</sub> catalysts is more than 1, which indicates that the crystallinity of carbon deposition generated on these two monometallic catalysts is low, and the carbon generated is mainly amorphous carbon or filamentary carbon, and it can be known from the results of TG and TEM that the carbon deposition generated on the In/Al<sub>2</sub>O<sub>3</sub> catalysts is amorphous carbon and that the carbon generated on the Ni/Al<sub>2</sub>O<sub>3</sub> catalysts is mainly filamentary carbon. For the 3Ni-2In/Al<sub>2</sub>O<sub>3</sub> catalyst, the heights of the D-band peak and G-band peak were significantly lower than the Ni/Al<sub>2</sub>O<sub>3</sub> and In/Al<sub>2</sub>O<sub>3</sub>, indicating that

less carbon was generated on the catalyst during the reaction process. The  $I_D/I_G$  ratio was 0.44, indicating that the carbon generated during the reaction process exhibited higher crystallinity and graphite carbon is formed, and the graphitic carbon generated can be oxidized by  $CO_2$  to form CO without affecting the DRM reaction.

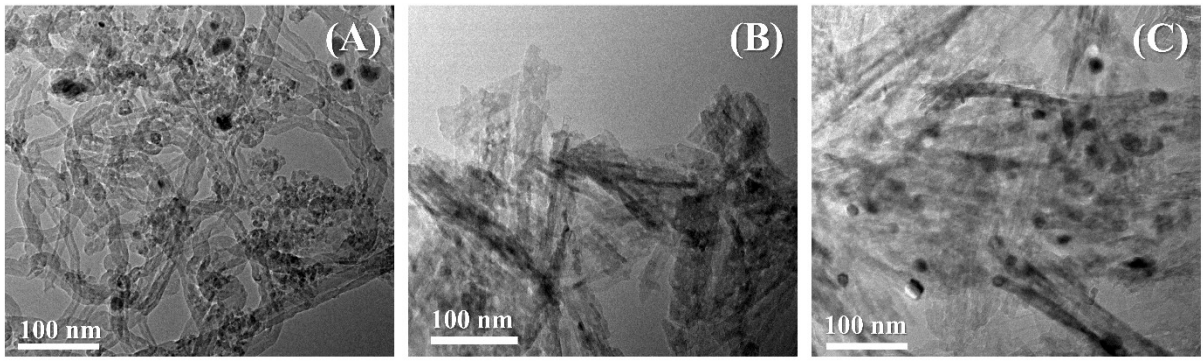

Fig. S8 TEM images of spent Ni/Al<sub>2</sub>O<sub>3</sub> (A), In/Al<sub>2</sub>O<sub>3</sub> (B), and 3Ni-2In/Al<sub>2</sub>O<sub>3</sub> (C).



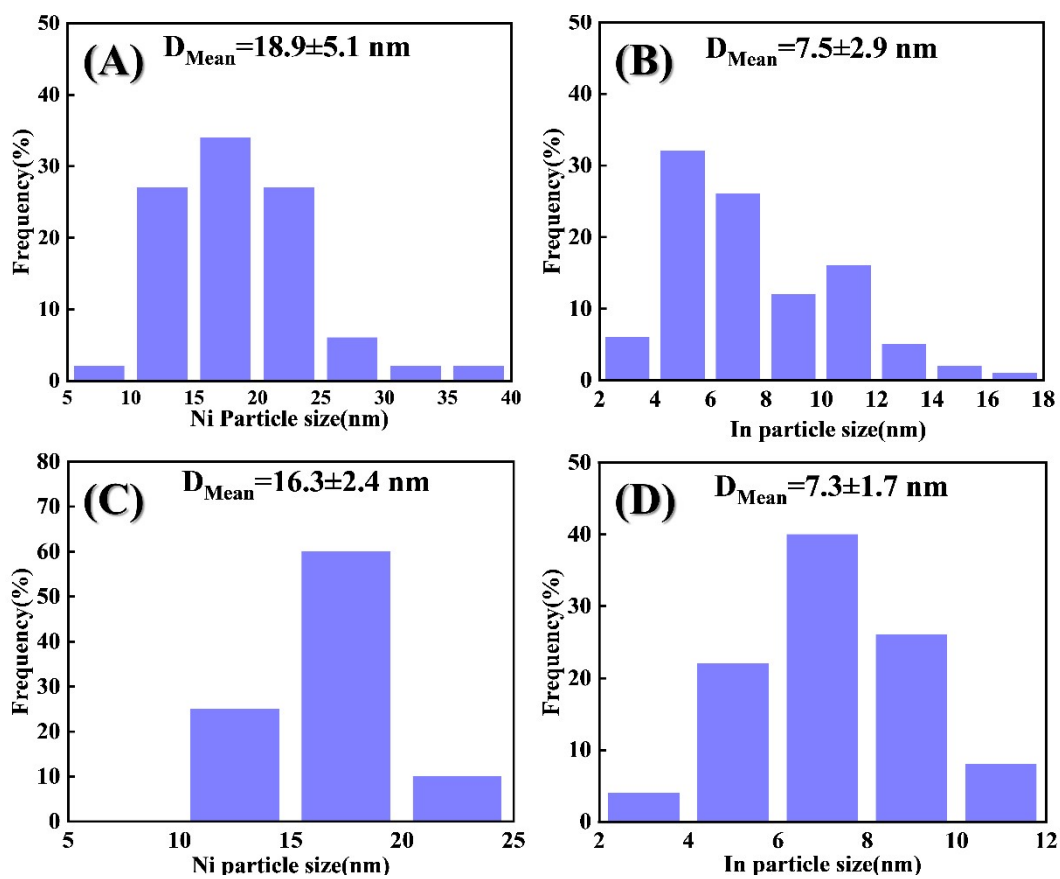

Fig. S9 Particle size distributions of Ni and In in the (A) spent Ni/Al<sub>2</sub>O<sub>3</sub>, (B) spent In/Al<sub>2</sub>O<sub>3</sub>, (C) and (D) spent 3Ni-2In/Al<sub>2</sub>O<sub>3</sub> catalyst.

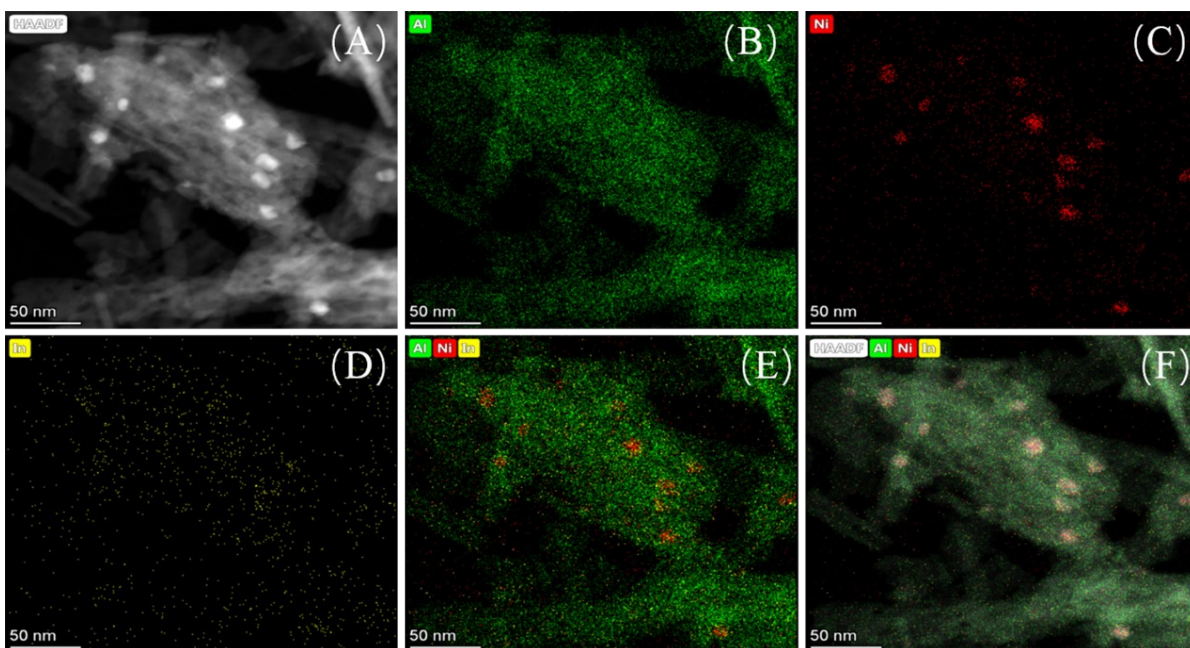

Fig. S10. HAADF-STEM images (A) and EDS profile of Al (B), Ni (C), In (D), and merged images (E) and (F) in spent Ni-In/ $\text{Al}_2\text{O}_3$  catalyst.

A typical HAADF-STEM image and the corresponding elemental mapping reveal the elemental distributions of Ni, In, and Al in the spent Ni-In/ $\text{Al}_2\text{O}_3$  samples, as shown in Fig. S10. The Ni particles in the spent catalysts were found to be more uniformly distributed than those in the reduced catalysts. This is due to the interaction between the two metals during the reaction, the instability of the In oxides increases the concentration of reactive oxygen near Ni, suppressing the agglomeration effect of Ni particles and making the reaction more active, and the Ni particles are more dispersed in the spent catalyst than in the reduced catalyst, the uniformly dispersed Ni reduces the emergence of carbon species during the reaction process, enhancing DRM stability.

## References

1. W. Liu, L. Li, S. Lin, Y. Luo, Z. Bao, Y. Mao, K. Li, D. Wu and H. Peng, *J. Energy Chem.*, 2022, **65**, 34-47.
2. A. Horváth, M. Németh, A. Beck, B. Maróti, G. Sáfrán, G. Pantaleo, L. F. Liotta, A. M. Venezia and V. La Parola, *App. Catal. A Gen.*, 2021, **621**, 118174.
3. J. Károlyi, M. Németh, C. Evangelisti, G. Sáfrán, Z. Schay, A. Horváth and F. Somodi, *J. Ind. Eng. Chem.*, 2018, **58**, 189-201.
4. H. Arbag, S. Yasyerli, N. Yasyerli, G. Dogu and T. Dogu, *Appl. Catal. B Environ.*, 2016, **198**, 254-265.
5. J. Huang, Y. Yan, S. Saqline, W. Liu and B. Liu, *Appl. Catal. B Environ.*, 2020, **275**, 119109.
6. E. Akiki, D. Akiki, C. Italiano, A. Vita, R. Abbas-Ghaleb, D. Chlala, G. Drago Ferrante, M. Laganà, L. Pino and S. Specchia, *Int. J. Hydrogen Energ.*, 2020, **45**, 21392-21408.
7. D. Li, S. Xu, K. Song, C. Chen, Y. Zhan and L. Jiang, *Appl. Catal., A*, 2018, **552**, 21-29.
8. M. Zhang, J. Zhang, Z. Zhou, S. Chen, T. Zhang, F. Song, Q. Zhang, N. Tsubaki, Y. Tan and Y. Han, *Appl. Catal. B Environ.*, 2020, **264**, 118522.
9. X. Wang, Y. Liu and K. Liu, *Int. J. Hydrogen Energ.*, 2020, **45**, 28325-28336.
10. G. Wang, Y. Liang, J. Song, H. Li and Y. Zhao, *Front Chem*, 2020, **8**, 220.
11. A. Jawad, F. Rezaei and A. A. Rownaghi, *Catal. Today*, 2020, **350**, 80-90.
12. S. Chu, Z. Cai, M. Wang, Y. Zheng, Y. Wang, Z. Zhou and W. Weng, *Nanoscale*, 2020, **12**, 20922-20932.
13. S. A. Shin, Y. S. Noh, G. H. Hong, J. I. Park, H. T. Song, K.-Y. Lee and D. J. Moon, *J. Taiwan. Inst. Chem. E.*, 2018, **90**, 25-32.
14. J.-H. Park, S. Yeo, I. HeO and T.-S. Chang, *App. Catal. A Gen.*, 2018, **562**, 120-131.
15. S. Das, M. Sengupta, A. Bag, M. Shah and A. Bordoloi, *Nanoscale*, 2018, **10**, 6409-6425.
16. A. Al-Fatesh, A. Ibrahim, J. Abu-Dahrieh, A. Al-Awadi, A. El-Toni, A. Fakeeha and A. Abasaheed, *Catalysts*, 2018, **8**, 229.
17. Y. Zhu, S. Zhang, B. Chen, Z. Zhang and C. Shi, *Catal. Today*, 2016, **264**, 163-170.
18. L. Jin, B. Ma, S. Zhao, X. He, Y. Li, H. Hu and Z. Lei, *Int. J. Hydrogen Energy*, 2018, **43**, 2689-2698.
19. J. G. Roblero, F. Pola-Albores, M. A. Valenzuela, E. Rojas-García, E. Ríos-Valdovinos and G. Valverde-Aguilar, *Int. J. Hydrogen Energ.*, 2019, **44**, 10473-10483.
